# Supplementary material
Source: PubMed Central journal article supplement (PMC6444619)
Supplement: ry181883suppa1.pdf [file ry181883suppa1.pdf]

**Table E1: Scores obtained from a survey inquiring on the coil preference (1 = preferred traditional coil, 5 = preferred screen-printed coil). The average scores for technologists, anesthesiologists and nurses were 4.2, 3.6 and 4.1 indicating strong preference of the screen-printed coil by ancillary staff. The data suggest that ease of positioning and setup is likely improved to that with the commercial 32 channel coil with a confidence of at least 70%. The data also suggest that the choice of airway can likely be maintained with a confidence of > 75% as per the anesthesiologists scoring. The choice of airway is improved with a confidence of > 73% as per the scoring of the nurses. Furthermore, the scores suggest that the choice of anesthetic is likely to be maintained with the new coil with a confidence of > 85% and > 87% as per anesthesiologists and nurses, respectively.**

|                                                 | Technologists                                                |                                                                  |                                                               | Anesthesiologists                                                      |                                                                            |                                                                  | Nurses                                                                 |                                                                            |                                                                  | Parents/<br>Child                                                                |
|-------------------------------------------------|--------------------------------------------------------------|------------------------------------------------------------------|---------------------------------------------------------------|------------------------------------------------------------------------|----------------------------------------------------------------------------|------------------------------------------------------------------|------------------------------------------------------------------------|----------------------------------------------------------------------------|------------------------------------------------------------------|----------------------------------------------------------------------------------|
|                                                 | Ease of positioning/setup (1 = much harder, 5 = much easier) | Overall coil preference (1 = traditional coil, 5 = printed coil) | Case coil preference (1 = traditional coil, 5 = printed coil) | Improvement in choice of airway (1 = much worsened, 5 = much improved) | Improvement in choice of anesthetic (1 = much worsened, 5 = much improved) | Overall coil preference (1 = traditional coil, 5 = printed coil) | Improvement in choice of airway (1 = much worsened, 5 = much improved) | Improvement in choice of anesthetic (1 = much worsened, 5 = much improved) | Overall coil preference (1 = traditional coil, 5 = printed coil) | Picture of printed coil, which do you prefer (1 = traditional, 5 = printed coil) |
| <b>Average</b>                                  | 4.2                                                          | 4.2                                                              | 4.2                                                           | 3.6                                                                    | 3.2                                                                        | 3.8                                                              | 4.2                                                                    | 3.9                                                                        | 4.2                                                              | 4.5                                                                              |
| <b>Overall average</b>                          | 4.2                                                          |                                                                  |                                                               | 3.6                                                                    |                                                                            |                                                                  | 4.1                                                                    |                                                                            |                                                                  | 4.5                                                                              |
| <b>Confidence interval with level 80% (≥ 3)</b> | [69.6% (13.9/20),                                            | [69.6% (13.9/20),                                                | [69.6% (13.9/20),                                             | [74.9% (15.0/20),                                                      | [84.8% (17.0/20),                                                          | [74.9% (15.0/20),                                                | [88.0% (17.6/20),                                                      | [87.3% (17.5/20),                                                          | [88.6% (17.8/20),                                                | [54.7% (10.9/20),                                                                |
|                                                 | 94.4% (18.9/20)]                                             | 94.4% (18.9/20)]                                                 | 94.4% (18.9/20)]                                              | 99.3% (19.9/20)]                                                       | 100.0% (20.0/20)]                                                          | 99.3% (19.9/20)]                                                 | 100.0% (20.0/20)]                                                      | 100.0% (20.0/20)]                                                          | 100.0% (20.0/20)]                                                | 98.5% (19.7/20)]                                                                 |
| <b>Confidence interval with level 80% (≥ 4)</b> | [69.6% (13.9/20),                                            | [63.8% (12.8/20),                                                | [58.5% (11.7/20),                                             | [36.9% (7.4/20),                                                       | [8.10% (1.6/20),                                                           | [36.9% (7.4/20),                                                 | [73.1% (14.6/20),                                                      | [43.3% (8.7/20),                                                           | [56.6% (11.3/20),                                                | [54.7% (10.9/20),                                                                |
|                                                 | 94.4% (18.9/20)]                                             | 91.0% (18.2/20)]                                                 | 87.3% (17.5/20)]                                              | 75.7% (15.1/20)]                                                       | 41.7% (8.3/20)]                                                            | 75.7% (15.1/20)]                                                 | 97.0% (19.4/20)]                                                       | 76.9% (15.4/20)]                                                           | 86.6% (17.3/20)]                                                 | 98.5% (19.7/20)]                                                                 |
